# Supplementary material for: Pericatheter Leak Associated With Earlier Peritoneal Dialysis Initiation Does Not Influence Long-Term Outcomes
Source: PubMed Central journal article supplement — Kidney Int Rep. 2024 Jul 10;9(9):2727–38. doi: 10.1016/j.ekir.2024.07.004 (PMC11403086; doi:10.1016/j.ekir.2024.07.004), 2024-07-10
Supplement: mmc1.pdf [file mmc1.pdf]

| <b>Supplementary Table S1: Complications Analysed According to Post-Procedural Care Setting: Total Cohort</b>                                                                                                           |                               |                                |                               |                |
|-------------------------------------------------------------------------------------------------------------------------------------------------------------------------------------------------------------------------|-------------------------------|--------------------------------|-------------------------------|----------------|
| <b>Outcomes</b>                                                                                                                                                                                                         | <b>Total Patients (n=297)</b> | <b>Outpatient Care (n=194)</b> | <b>Inpatient Care (n=103)</b> | <b>P value</b> |
| <b>PD Catheter Complication (n, %)</b>                                                                                                                                                                                  | 174 (58.6%)                   | 116 (59.8%)                    | 58 (56.3%)                    | 0.3            |
| <b>Infectious Complications</b>                                                                                                                                                                                         |                               |                                |                               |                |
| PD Catheter Insertion-Related Peritonitis <sup>^</sup> (n, %)                                                                                                                                                           | 19 (6.4%)                     | 13 (6.7%)                      | 6 (5.8%)                      | 0.99           |
| PD-related peritonitis* (n, %)                                                                                                                                                                                          | 96 (32.3%)                    | 65 (33.5%)                     | 31 (30.1%)                    | 0.95           |
| Time to PD-related peritonitis (days, (SD))                                                                                                                                                                             | 241.7 +/- 233.6               | 224.1 +/- 220.1                | 278.6 +/- 259.6               | 0.3            |
| PD Catheter Insertion-Related Exit Site Infection <sup>^</sup> (n, %)                                                                                                                                                   | 21 (7.1%)                     | 19 (9.8%)                      | 2 (1.9%)                      | 0.1            |
| PD Exit Site Infection (n, %)                                                                                                                                                                                           | 80 (26.9%)                    | 59 (30.4%)                     | 21 (20.4%)                    | 0.3            |
| PD Catheter Insertion-Related Tunnel Infection <sup>^</sup> (n, %)                                                                                                                                                      | 1 (0.3%)                      | 1 (0.5%)                       | 0 (0.0%)                      | 0.7            |
| Tunnel Infection (n, %)                                                                                                                                                                                                 | 15 (5.1%)                     | 8 (4.1%)                       | 7 (6.8%)                      | 0.2            |
| <b>Mechanical Complications</b>                                                                                                                                                                                         |                               |                                |                               |                |
| Failed Insertion (n, %)                                                                                                                                                                                                 | 0 (0.0%)                      | 0 (0.0%)                       | 0 (0.0%)                      | -              |
| Organ Injury (n, %)                                                                                                                                                                                                     | 1 (0.03%)                     | 0 (0.0%)                       | 1 (1.0%)                      | 0.3            |
| Haemoperitoneum (n, %)                                                                                                                                                                                                  | 1 (0.03%)                     | 0 (0.0%)                       | 1 (1.0%)                      | 0.3            |
| Surgical Site Bleeding (n, %)                                                                                                                                                                                           | 7 (2.4%)                      | 5 (2.6%)                       | 2 (1.9%)                      | 0.5            |
| Pericatheter Leak (n, %)                                                                                                                                                                                                | 10 (3.4%)                     | 8 (4.1%)                       | 2 (1.9%)                      | 0.3            |
| Malposition (n, %)                                                                                                                                                                                                      | 18 (6.1%)                     | 13 (6.7%)                      | 5 (4.9%)                      | 0.4            |
| Pleuroperitoneal Leak (n, %)                                                                                                                                                                                            | 6 (2.0%)                      | 2 (1.0%)                       | 4 (3.9%)                      | 0.1            |
| Other Complication (n, %)                                                                                                                                                                                               | 6 (2.1%)                      | 3 (1.6%)                       | 3 (3.0%)                      | 0.4            |
| <b>Bridging Haemodialysis due to PD Complication (n, %)</b>                                                                                                                                                             | 11 (3.7%)                     | 6 (3.1%)                       | 5 (4.9%)                      | 0.3            |
| <b>Need for PD Catheter Removal (n, %)</b>                                                                                                                                                                              | 64 (21.5%)                    | 40 (20.6%)                     | 24 (23.3%)                    | 0.3            |
| <b>Permanent Transfer to Haemodialysis due to PD Complication<sup>#</sup> (n, %)</b>                                                                                                                                    | 57 (19.4%)                    | 32 (16.7%)                     | 25 (24.5%)                    | 0.1            |
| <sup>^</sup> PD Catheter Insertion-Related peritonitis defined as peritonitis occurring within 30 days of PD catheter insertion <sup>15</sup>                                                                           |                               |                                |                               |                |
| <sup>*</sup> PD-related peritonitis defined as peritonitis occurring after PD commencement <sup>15</sup>                                                                                                                |                               |                                |                               |                |
| <sup>^</sup> PD Catheter Insertion-Related Exit Site infection defined as exit site infection occurring within 30 days of PD catheter insertion <sup>16</sup>                                                           |                               |                                |                               |                |
| <sup>^</sup> PD Catheter Insertion-Related Tunnel Infection defined as tunnel infection occurring within 30 days of PD catheter insertion <sup>16</sup>                                                                 |                               |                                |                               |                |
| <sup>#</sup> Permanent transfer to haemodialysis defined as permanent transfer to haemodialysis for $\geq 30$ days <sup>17,18</sup>                                                                                     |                               |                                |                               |                |
| Complication episodes according to post-procedural care setting. There was no significant between-group difference in complications when comparing patients who received outpatient and inpatient post-procedural care. |                               |                                |                               |                |
